# Supplementary material for: Mantle potential temperature and felsic continental crust control the initiation and cessation of plate tectonics
Source: Research Square preprint supplement (doi:10.21203/rs.3.rs-3346823/v1), 2023-11-21
Supplement: Supplementary file 2 [file 8a425ceb57ca16ddac1d1d72.xlsx]

## Sheet: Sheet1
Materiala	ρ0(kg/m3)	Cp (J kg−1 K−1)	k (W m−1 K−1)	Hr (μWm-3)	Flow law
						η0 (Pan s )	E (kJ/mol)	V (J MPa−1 mol−1)	n	AD (MPa−n s−1)	C (MPa)	sin(φeff)
Sticky air	1	3.3 × 106	200	0	1018Pa s	–	–	–	–	–	–	–
sticky water	1000	3.3 × 103	200	0	1018Pa s	–	–	–	–	–	–	–
Sediment (solid)	2700	1000	K1	2	Wet quartzite	1.97e+17	154	0	2.3	3.2e-06	1	0.15
Upper continental crust (solid)	2700	1000	K1	1	Wet quartzite	1.97e+19	154	0	2.3	3.2e-06	20	0.15
Lower continental crust (solid)	3000	1000	K1	1	Plagioclase An75	4.8e+22	238	0	3.2	0.00033	20	0.45
Lithosphere/dry mantle	3300	1000	K3	0.022	Dry olivine	3.98e+16	532	8	3.5	25000	40	0.6
Wet mantle (solid)	3200	1000	K3	0.022	Wet olivine	5.01e+20	470	8	4	2000	1	0.06
Mantle (Serpentinized/hydrated)	3200	1000	K3	0.022	Serpentine	3.21e+36	8.9	3.2	3.8	1.97e-33	1	0.06
Mafic underplating	3200	1000	K1	3	clinopyroxene	3.21e+36	670	0	2.7	1.56e-34	1	0.06
Referencesc	1	/	2	3	4,5	4,6	4,6	4,6	4,6	4,6	–	–
a ρ0 = reference density; Cp = specific heat capacity; k = thermal conductivity; Hr=radioactive heat;C = cohesion; sin (φff) = effective friction coefficient;η0 = reference viscosity; E = activation energy; V = activation volume; n = is the stress exponent; AD = material constant.
b K1 = (0.64 + 807/(TK + 77))·exp.(0.00004PMPa); K2 = (1.18 + 474/(TK + 77))·exp.(0.00004PMPa); K3 = (0.73 + 1293/(TK + 77))·exp.(0.00004PMPa).
c References: 1, Bittner and Schmeling (1995); 2, Clauser and Huenges (1995); 3, Turcotte and Schubert (2002); 4, Ranalli, (1995); 5,Hilairet et al., (2007) 6, Ranalli and Murthy (1987);
