# Supplementary material for: Mantle potential temperature and felsic continental crust control the initiation and cessation of plate tectonics
Source: Research Square preprint supplement (doi:10.21203/rs.3.rs-3346823/v1), 2023-11-21
Supplement: Supplementary file 3 [file c3ecc7ab23c37104a23544ef.xlsx]

## Sheet: Model results
Table S1 The model results
ID	The initial Moho depth (km)	The mantle potential temperatures(°C)	series
Model 001	28	1073	4	Fig. 2;Fig. 3;Fig. S3
Model 002	28	1123	4	Fig. 2;Fig. 3;Fig. S3
Model 003	28	1173	4	Fig. 2;Fig. 3;Fig. S3
Model 004	28	1223	4	Fig. 2;Fig. 3;Fig. S3
Model 005	28	1273	4	Fig. 2;Fig. 3;Fig. S3
Model 006	28	1323	4	Fig. 2;Fig. 3;Fig. S3
Model 007	28	1373	4	Fig. 2;Fig. 3;Fig. S3
Model 008	28	1423	4	Fig. 2;Fig. 3;Fig. S3
Model 009	28	1473	4	Fig. 2;Fig. 3;Fig. S3
Model 010	28	1523	4	Fig. 2;Fig. 3;Fig. S3
Model 011	28	1573	4	Fig. 2;Fig. 3;Fig. S3
Model 012	28	1623	4	Fig. 2;Fig. 3;Fig. S3
Model 013	28	1673	4	Fig. 2;Fig. 3;Fig. S3
Model 014	28	1723	4	Fig. 2;Fig. 3;Fig. S3
Model 015	28	1773	4	Fig. 2;Fig. 3;Fig. S3
Model 016	28	1823	4	Fig. 2;Fig. 3;Fig. S3
Model 017	28	1873	4	Fig. 2;Fig. 3;Fig. S3
Model 018	32	1073	4	Fig. 2;Fig. 3;Fig. S3
Model 019	32	1123	4	Fig. 2;Fig. 3;Fig. S3
Model 020	32	1173	4	Fig. 2;Fig. 3;Fig. S3
Model 021	32	1223	4	Fig. 2;Fig. 3;Fig. S3
Model 022	32	1273	4	Fig. 2;Fig. 3;Fig. S3
Model 023	32	1323	4	Fig. 2;Fig. 3;Fig. S3
Model 024	32	1373	4	Fig. 2;Fig. 3;Fig. S3
Model 025	32	1423	4	Fig. 2;Fig. 3;Fig. S3
Model 026	32	1473	4	Fig. 2;Fig. 3;Fig. S3
Model 027	32	1523	4	Fig. 2;Fig. 3;Fig. S3
Model 028	32	1573	4	Fig. 2;Fig. 3;Fig. S3
Model 029	32	1623	4	Fig. 2;Fig. 3;Fig. S3
Model 030	32	1673	4	Fig. 2;Fig. 3;Fig. S3
Model 031	32	1723	4	Fig. 2;Fig. 3;Fig. S3
Model 032	32	1773	4	Fig. 2;Fig. 3;Fig. S3
Model 033	32	1823	4	Fig. 2;Fig. 3;Fig. S3
Model 034	32	1873	4	Fig. 2;Fig. 3;Fig. S3
Model 035	36	1073	4	Fig. 2;Fig. 3;Fig. S3
Model 036	36	1123	4	Fig. 2;Fig. 3;Fig. S3
Model 037	36	1173	4	Fig. 2;Fig. 3;Fig. S3
Model 038	36	1223	4	Fig. 2;Fig. 3;Fig. S3
Model 039	36	1273	4	Fig. 2;Fig. 3;Fig. S3
Model 040	36	1323	4	Fig. 2;Fig. 3;Fig. S3
Model 041	36	1373	4	Fig. 2;Fig. 3;Fig. S3
Model 042	36	1423	4	Fig. 2;Fig. 3;Fig. S3
Model 043	36	1473	4	Fig. 2;Fig. 3;Fig. S3
Model 044	36	1523	4	Fig. 2;Fig. 3;Fig. S3
Model 045	36	1573	4	Fig. 2;Fig. 3;Fig. S3
Model 046	36	1623	4	Fig. 2;Fig. 3;Fig. S3
Model 047	36	1673	4	Fig. 2;Fig. 3;Fig. S3
Model 048	36	1723	4	Fig. 2;Fig. 3;Fig. S3
Model 049	36	1773	4	Fig. 2;Fig. 3;Fig. S3
Model 050	36	1823	4	Fig. 2;Fig. 3;Fig. S3
Model 051	36	1873	4	Fig. 2;Fig. 3;Fig. S3
Model 052	40	1073	4	Fig. 2;Fig. 3;Fig. S3
Model 053	40	1123	4	Fig. 2;Fig. 3;Fig. S3
Model 054	40	1173	4	Fig. 2;Fig. 3;Fig. S3
Model 055	40	1223	4	Fig. 2;Fig. 3;Fig. S3
Model 056	40	1273	4	Fig. 2;Fig. 3;Fig. S3
Model 057	40	1323	4	Fig. 2;Fig. 3;Fig. S3
Model 058	40	1373	4	Fig. 2;Fig. 3;Fig. S3
Model 059	40	1423	4	Fig. 2;Fig. 3;Fig. S3
Model 060	40	1473	4	Fig. 2;Fig. 3;Fig. S3
Model 061	40	1523	4	Fig. 2;Fig. 3;Fig. S3
Model 062	40	1573	4	Fig. 2;Fig. 3;Fig. S3
Model 063	40	1623	4	Fig. 2;Fig. 3;Fig. S3
Model 064	40	1673	4	Fig. 2;Fig. 3;Fig. S3
Model 065	40	1723	4	Fig. 2;Fig. 3;Fig. S3
Model 066	40	1773	4	Fig. 2;Fig. 3;Fig. S3
Model 067	40	1823	4	Fig. 2;Fig. 3;Fig. S3
Model 068	44	1873	4	Fig. 2;Fig. 3;Fig. S3
Model 069	44	1073	4	Fig. 2;Fig. 3;Fig. S3
Model 070	44	1123	4	Fig. 2;Fig. 3;Fig. S3
Model 071	44	1173	4	Fig. 2;Fig. 3;Fig. S3
Model 072	44	1223	4	Fig. 2;Fig. 3;Fig. S3
Model 073	44	1273	4	Fig. 2;Fig. 3;Fig. S3
Model 074	44	1323	4	Fig. 2;Fig. 3;Fig. S3
Model 075	44	1373	4	Fig. 2;Fig. 3;Fig. S3
Model 076	44	1423	4	Fig. 2;Fig. 3;Fig. S3
Model 077	44	1473	4	Fig. 2;Fig. 3;Fig. S3
Model 078	44	1523	4	Fig. 2;Fig. 3;Fig. S3
Model 079	44	1573	4	Fig. 2;Fig. 3;Fig. S3
Model 080	44	1623	4	Fig. 2;Fig. 3;Fig. S3
Model 081	44	1673	4	Fig. 2;Fig. 3;Fig. S3
Model 082	44	1723	4	Fig. 2;Fig. 3;Fig. S3
Model 083	44	1773	4	Fig. 2;Fig. 3;Fig. S3
Model 084	44	1823	4	Fig. 2;Fig. 3;Fig. S3
Model 085	44	1873	4	Fig. 2;Fig. 3;Fig. S3
Model 086	48	1073	4	Fig. 2;Fig. 3;Fig. S3
Model 087	48	1123	4	Fig. 2;Fig. 3;Fig. S3
Model 088	48	1173	4	Fig. 2;Fig. 3;Fig. S3
Model 089	48	1223	4	Fig. 2;Fig. 3;Fig. S3
Model 090	48	1273	4	Fig. 2;Fig. 3;Fig. S3
Model 091	48	1323	4	Fig. 2;Fig. 3;Fig. S3
Model 092	48	1373	4	Fig. 2;Fig. 3;Fig. S3
Model 093	48	1423	4	Fig. 2;Fig. 3;Fig. S3
Model 094	48	1473	4	Fig. 2;Fig. 3;Fig. S3
Model 095	48	1523	4	Fig. 2;Fig. 3;Fig. S3
Model 096	48	1573	4	Fig. 2;Fig. 3;Fig. S3
Model 097	48	1623	4	Fig. 2;Fig. 3;Fig. S3
Model 098	48	1673	4	Fig. 2;Fig. 3;Fig. S3
Model 099	48	1723	4	Fig. 2;Fig. 3;Fig. S3
Model 100	48	1773	4	Fig. 2;Fig. 3;Fig. S3
Model 101	48	1823	4	Fig. 2;Fig. 3;Fig. S3
Model 102	48	1873	4	Fig. 2;Fig. 3;Fig. S3
0 - flat subduction; 1 - steep subduction; 2 double subduction; 3 drip-delamination mode; 4 no plate tectonic or transtion
ID	The initial Moho depth (km)	The mantle potential temperatures(°C)
Model 102	48	1729	Fig. 4
Model 103	48	1813	Fig. 4
Model 104	48	1893	Fig. 4
Model 105	48	1723	Fig. 4
Model 106	48	1803	Fig. 4
Model 107	48	1873	Fig. 4
Model 108	46	1740	Fig. 4
Model 109	46	1823	Fig. 4
Model 110	46	1903	Fig. 4
Model 111	46	1733	Fig. 4
Model 112	46	1817	Fig. 4
Model 113	46	1897	Fig. 4
Model 114	44	1743	Fig. 4
Model 115	44	1827	Fig. 4
Model 116	44	1908	Fig. 4
Model 117	44	1723	Fig. 4
Model 118	44	1823	Fig. 4
Model 119	44	1873	Fig. 4
Model 120	44	1673	Fig. 4
Model 121	44	1773	Fig. 4
Model 122	44	1823	Fig. 4
Model 123	44	1623	Fig. 4
Model 124	44	1723	Fig. 4
Model 125	44	1773	Fig. 4
Model 126	42	1751	Fig. 4
Model 127	42	1833	Fig. 4
Model 128	42	1913	Fig. 4
Model 129	40	1753	Fig. 4
Model 130	40	1835	Fig. 4
Model 131	40	1916	Fig. 4
Model 132	40	1723	Fig. 4
Model 133	40	1823	Fig. 4
Model 134	40	1873	Fig. 4
Model 135	38	1759	Fig. 4
Model 136	38	1840	Fig. 4
Model 137	38	1921	Fig. 4
Model 138	38	1756	Fig. 4
Model 139	38	1838	Fig. 4
Model 140	38	1919	Fig. 4
Model 141	36	1723	Fig. 4
Model 142	36	1823	Fig. 4
Model 143	36	1873	Fig. 4
Model 144	34	1762	Fig. 4
Model 145	34	1843	Fig. 4
Model 146	34	1924	Fig. 4
Model 147	34	1761	Fig. 4
Model 148	34	1842	Fig. 4
Model 149	34	1923	Fig. 4
Model 150	32	1773	Fig. 4
Model 151	32	1823	Fig. 4
Model 152	32	1873	Fig. 4
Model 153	28	1773	Fig. 4
Model 154	28	1823	Fig. 4
Model 155	28	1873	Fig. 4
Model 156	28	1073	Fig. 4
Model 157	28	1173	Fig. 4
Model 158	28	1273	Fig. 4
Model 159	28	1373	Fig. 4
Model 160	28	1473	Fig. 4
Model 161	24	1773	Fig. 4
Model 162	24	1823	Fig. 4
Model 163	24	1873	Fig. 4
Model 164	20	1773	Fig. 4
Model 165	20	1823	Fig. 4
Model 166	20	1873	Fig. 4
Model 167	16	1723	Fig. 4
Model 168	16	1823	Fig. 4
Model 169	16	1873	Fig. 4

## Sheet: Sheet1
28	1073	4
28	1123	4
28	1173	4
28	1223	4
28	1273	4
28	1323	4
28	1373	4
28	1423	4
28	1473	4
28	1523	4
28	1573	4
28	1623	4
28	1673	4
28	1723	4
28	1773	4
28	1823	4
28	1873	4
32	1073	4
32	1123	4
32	1173	4
32	1223	4
32	1273	4
32	1323	4
32	1373	4
32	1423	4
32	1473	4
32	1523	4
32	1573	4
32	1623	4
32	1673	4
32	1723	4
32	1773	4
32	1823	4
32	1873	4
36	1073	4
36	1123	4
36	1173	4
36	1223	4
36	1273	4
36	1323	4
36	1373	4
36	1423	4
36	1473	4
36	1523	4
36	1573	4
36	1623	4
36	1673	4
36	1723	4
36	1773	4
36	1823	4
36	1873	4
40	1073	4
40	1123	4
40	1173	4
40	1223	4
40	1273	4
40	1323	4
40	1373	4
40	1423	4
40	1473	4
40	1523	4
40	1573	4
40	1623	4
40	1673	4
40	1723	4
40	1773	4
40	1823	4
44	1873	4
44	1073	4
44	1123	4
44	1173	4
44	1223	4
44	1273	4
44	1323	4
44	1373	4
44	1423	4
44	1473	4
44	1523	4
44	1573	4
44	1623	4
44	1673	4
44	1723	4
44	1773	4
44	1823	4
44	1873	4
48	1073	4
48	1123	4
48	1173	4
48	1223	4
48	1273	4
48	1323	4
48	1373	4
48	1423	4
48	1473	4
48	1523	4
48	1573	4
48	1623	4
48	1673	4
48	1723	4
48	1773	4
48	1823	4
48	1873	4
